# Supplementary material for: Bone Marrow Homeostasis Is Impaired via JAK/STAT and Glucocorticoid Signaling in Cancer Cachexia Model
Source: PubMed Central journal article supplement (PMC7958949; doi:10.3390/cancers13051059), 2021-03-02
Supplement: cancers-13-01059-s001.pdf [file cancers-13-01059-s001.pdf]

# Bone Marrow Homeostasis is Impaired via JAK/STAT and Glucocorticoid Signaling in Cancer Cachexia Model

Jinyeong Yu <sup>1,†</sup>, Sanghyuk Choi <sup>1,†</sup>, Aran Park <sup>1</sup>, Jungbeom Do <sup>2</sup>, Donghyun Nam <sup>2</sup>, Youngjae Kim <sup>2</sup>, Jinok Noh <sup>2</sup>, Kil Yeon Lee <sup>3</sup>, Chi Hoon Maeng <sup>4</sup> and Ki-Sook Park <sup>2,5,\*</sup>

<sup>1</sup> Graduate School of Biotechnology, Kyung Hee University, Yongin 17104, Korea

<sup>2</sup> Department of Biomedical Science and Technology, Graduate School, Kyung Hee University, Seoul 02447, Korea

<sup>3</sup> Department of Surgery, College of Medicine, Kyung Hee University, Seoul 02447, Korea

<sup>4</sup> Department of Internal Medicine, College of Medicine, Kyung Hee University, Seoul 02447, Korea

<sup>5</sup> East-West Medical Research Institute, Kyung Hee University, Seoul 02447, Korea

\* Correspondence: Ki-Sook Park, PhD, [kisookpark@khu.ac.kr](mailto:kisookpark@khu.ac.kr), Tel.: +82-2-958-9368

<sup>†</sup>equally contributing authors

| Gene symbol | Antibody Name        | LLC 25d /CTL 25d |
|-------------|----------------------|------------------|
| Ctf1        | Cardiotrophin-1      | NA               |
| Ghr         | Growth Hormone R     | NA               |
| Il4         | IL-4                 | NA               |
| Il6ra       | IL-6 R               | NA               |
| Il10ra      | IL-10 R alpha        | NA               |
| Il15        | IL-15                | NA               |
| Il21        | IL-21                | NA               |
| Il24        | IL-24                | NA               |
| Il31ra      | IL-31 RA             | NA               |
| Lep         | LEPTIN(OB)           | NA               |
| Tnfrsf1a    | TNF R1/TNFRSF1A      | NA               |
| Ifnb1       | IFN-beta             | 48.133           |
| Il13        | IL-13                | 25.630           |
| Il22        | IL-22                | 19.904           |
| Kit         | SCF R/c-kit          | 19.543           |
| Cd40        | CD40                 | 9.658            |
| Epo         | Erythropoietin (EPO) | 7.400            |
| Csf2        | GM-CSF               | 6.851            |
| Il6         | IL-6                 | 6.198            |
| Tnfrsf18    | GITR                 | 5.911            |
| Il22ra2     | IL-22BP              | 5.157            |
| Tslp        | TSLP                 | 4.681            |
| Tnfsf18     | GITR Ligand/TNFSF18  | 4.089            |
| Ifng        | IFN-g                | 2.739            |
| Il3         | IL-3                 | 2.637            |
| Il23a       | IL-23                | 2.597            |
| Il2         | IL-2                 | 2.467            |
| Igf1        | IGF-I                | 2.131            |
| Il5         | IL-5                 | 2.042            |
| Cxcl5       | LIX                  | 1.838            |
| Il10        | IL-10                | 1.811            |
| Fgfr3       | FGF R3               | 1.448            |
| Ccl5        | RANTES               | 1.199            |
| Tnf         | TNFalpha             | 0.853            |
| Lif         | LIF                  | 0.798            |
| Prl         | Prolactin            | 0.739            |
| Il11        | IL-11                | 0.929            |
| Csf3        | G-CSF                | 4.614            |
| Thpo        | TPO                  | NA               |
| Lepr        | Leptin R             | 3.868            |
| Il7         | IL-7                 | NA               |
| Il9         | IL-9                 | 2.876            |
| Ifnar1      | IFN-alpha/beta R1    | 5.418            |
| Ifnar2      | IFN-alpha/beta R2    | NA               |
| Il12rb1     | IL-12 R beta 1       | 6.755            |
| Il12a/b     | IL-12p40/p70         | 2.971            |
| Il12a/b     | IL-12p70             | 1.528            |

**Supplementary Figure. S1:** Results of Protein antibody array: A list of proteins that regulate JAK/STAT signaling.

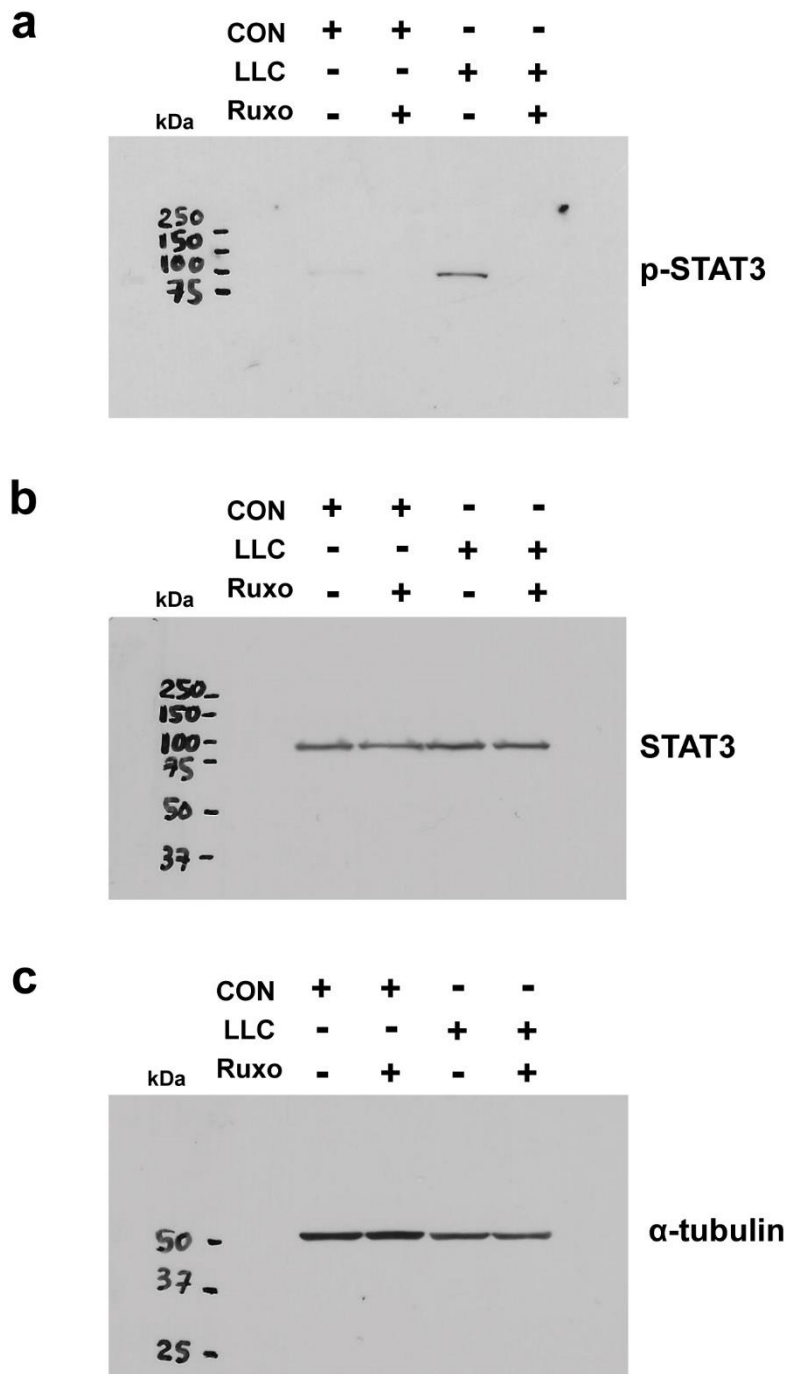

**Supplementary Figure. S2:** Full unedited blots of Figure 4b. (a) A full unedited blot for p-STAT3 (b) A full unedited blot for STAT3. (c) A full unedited blot for  $\alpha$ -tubulin.
